# Supplementary material
Source: Elsevier journal article supplement (https://cris.unibo.it/retrieve/handle/11585/1011863/46159178-8bc6-403d-92ff-d86338ce781f/mmc1.docx)

**Supplementary File 1:** Agree II Checklist


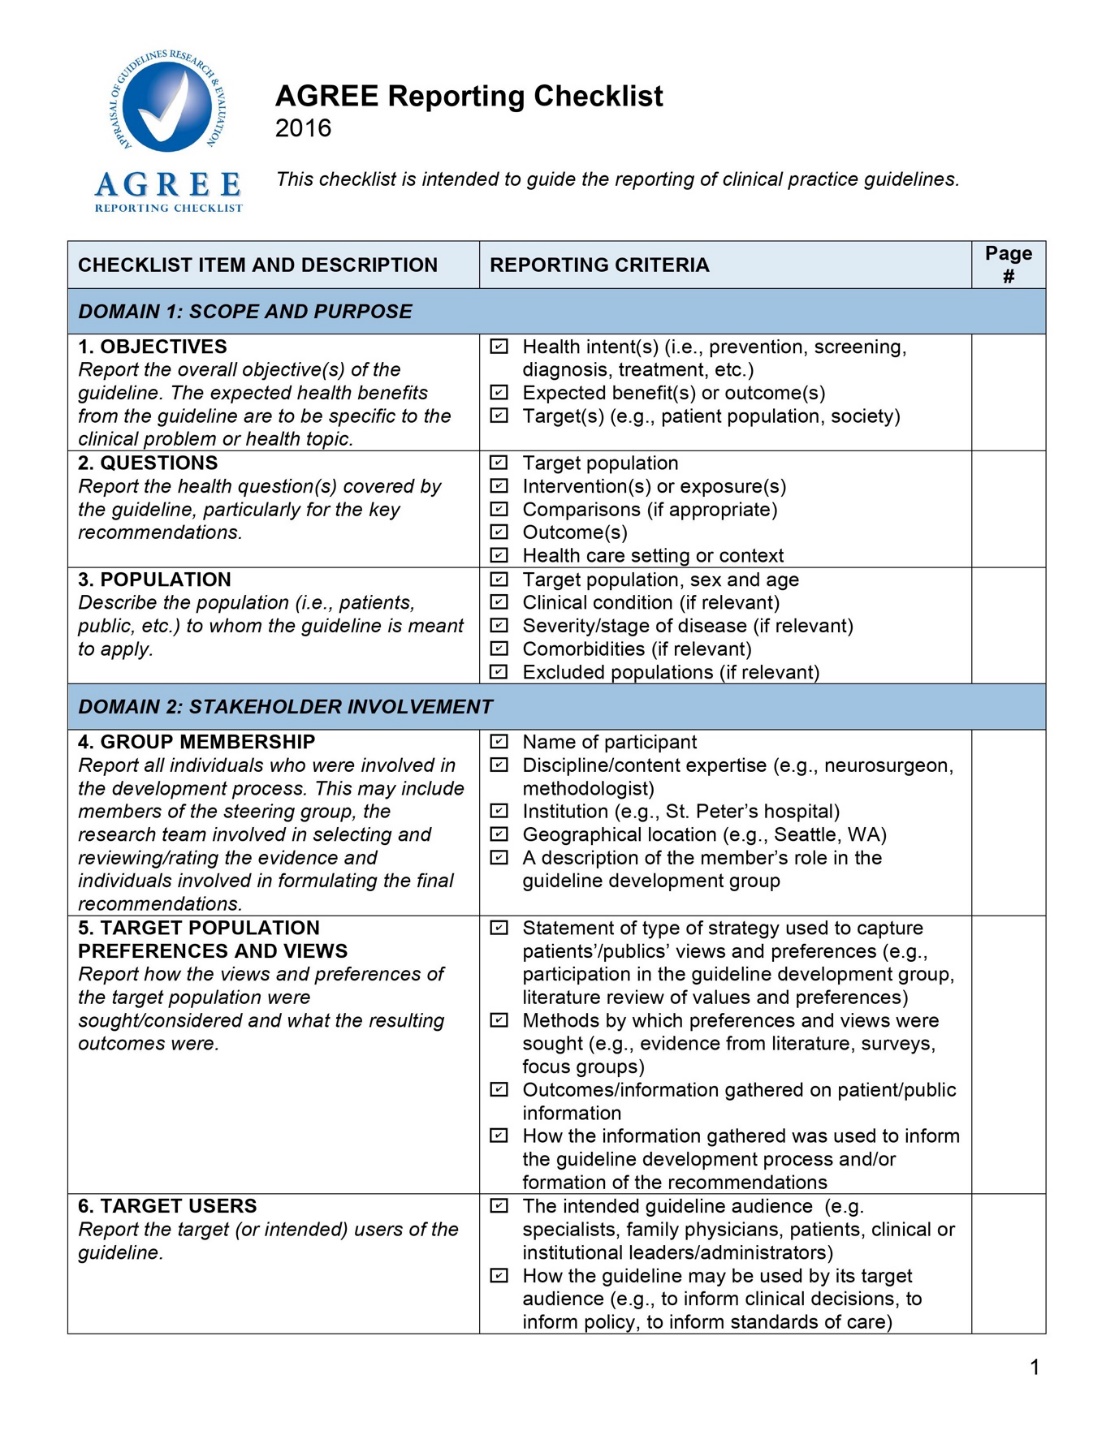


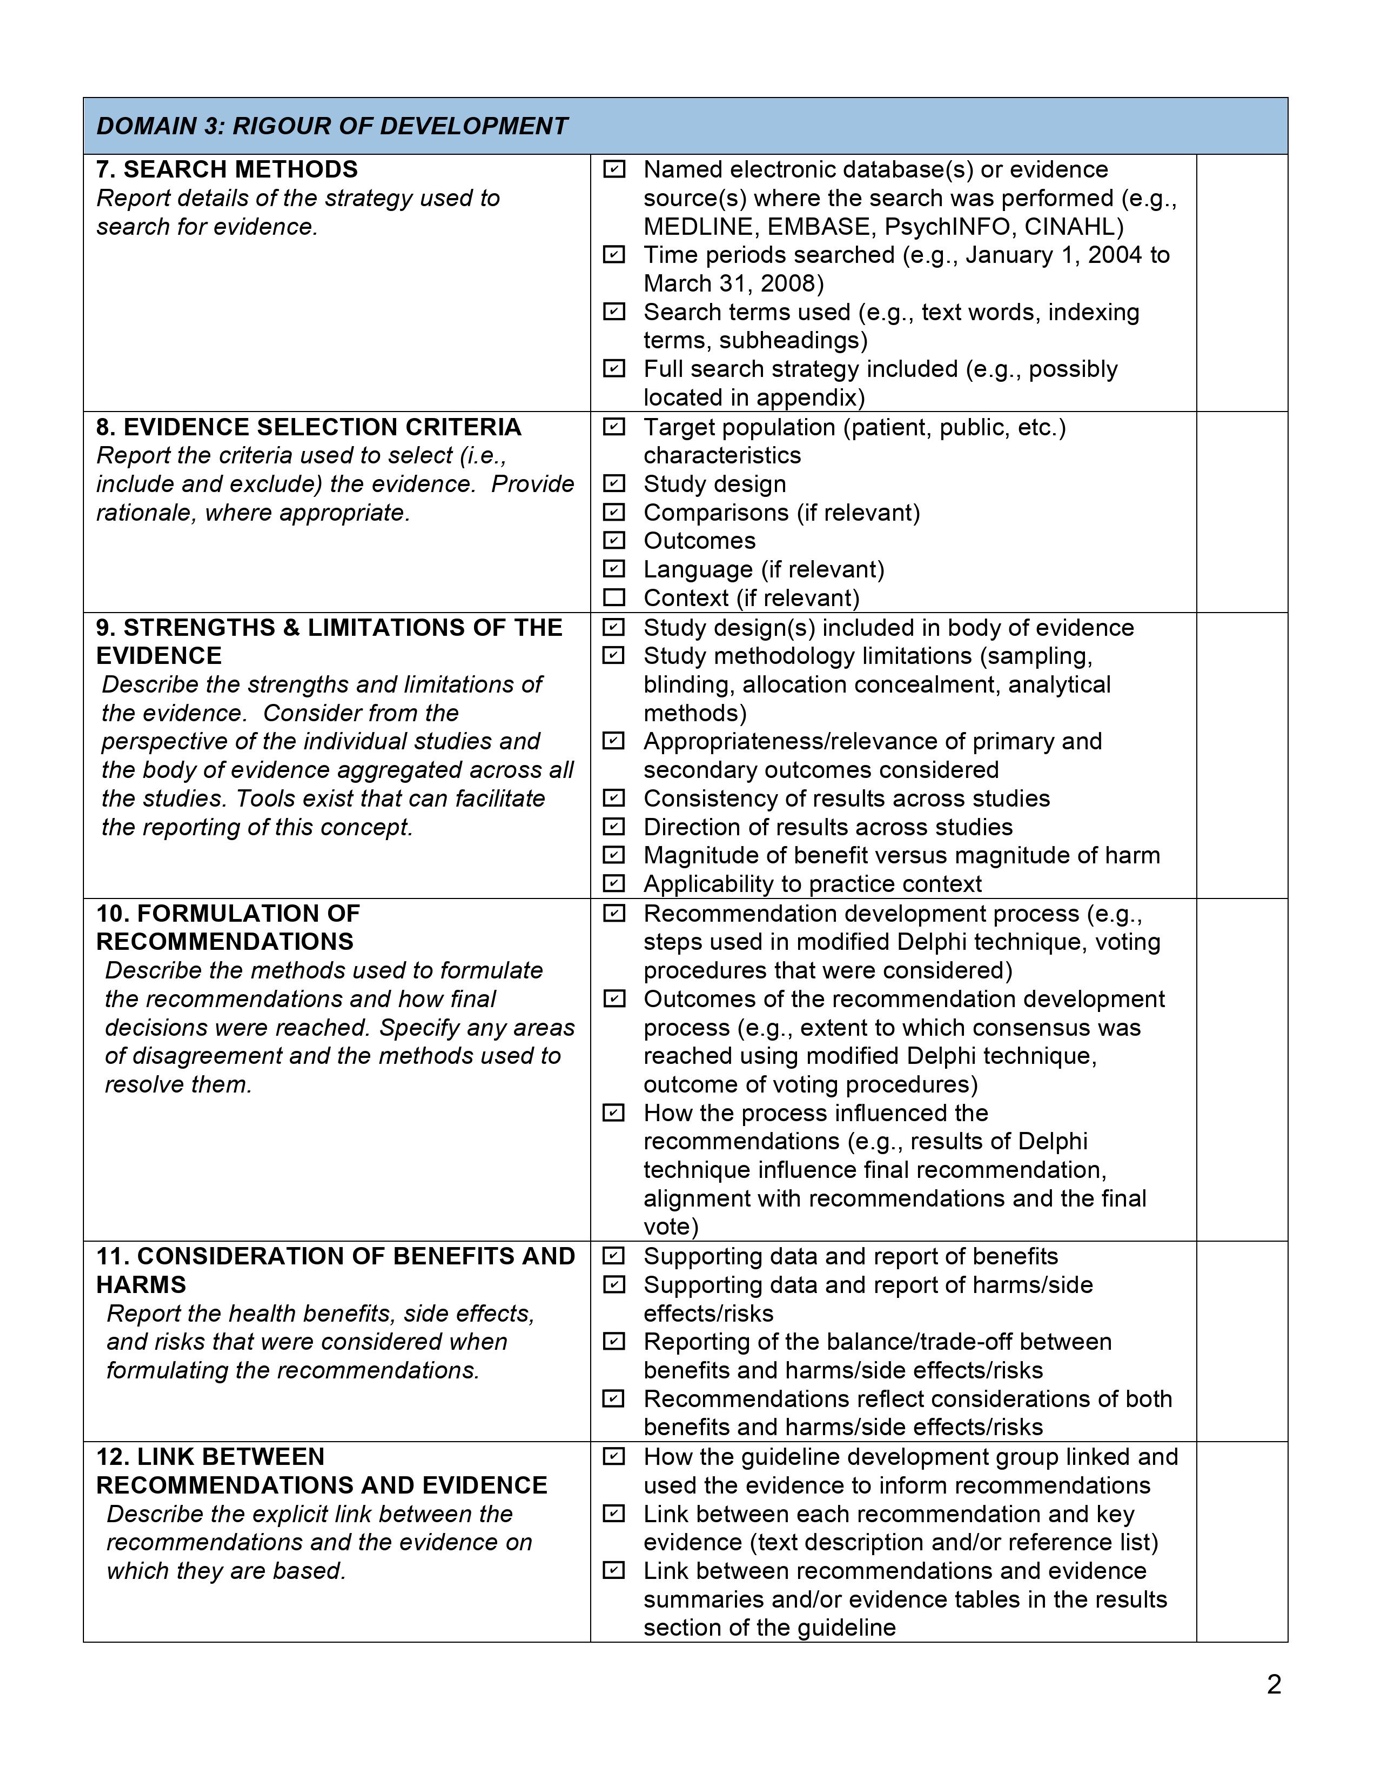

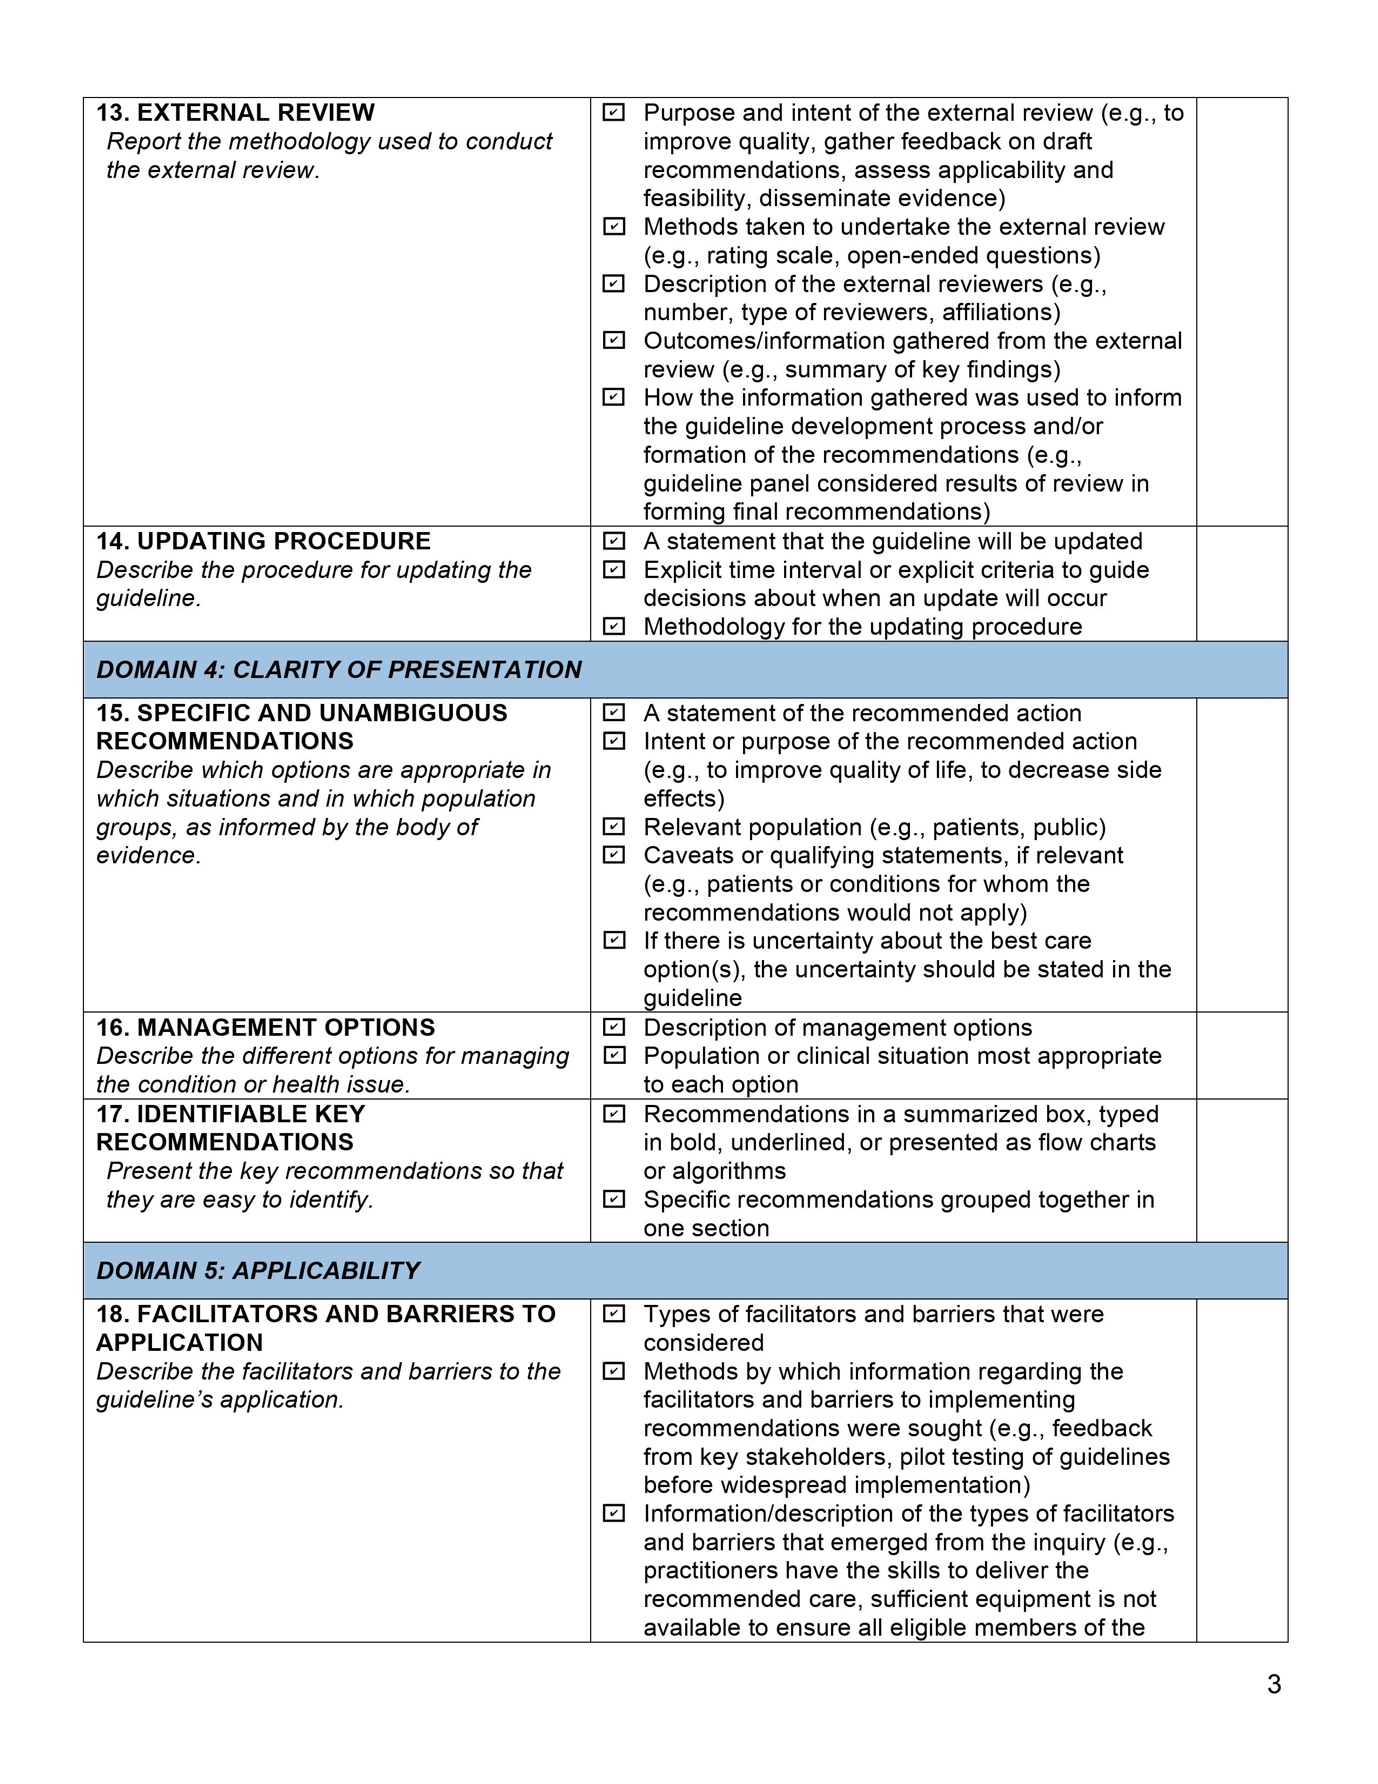

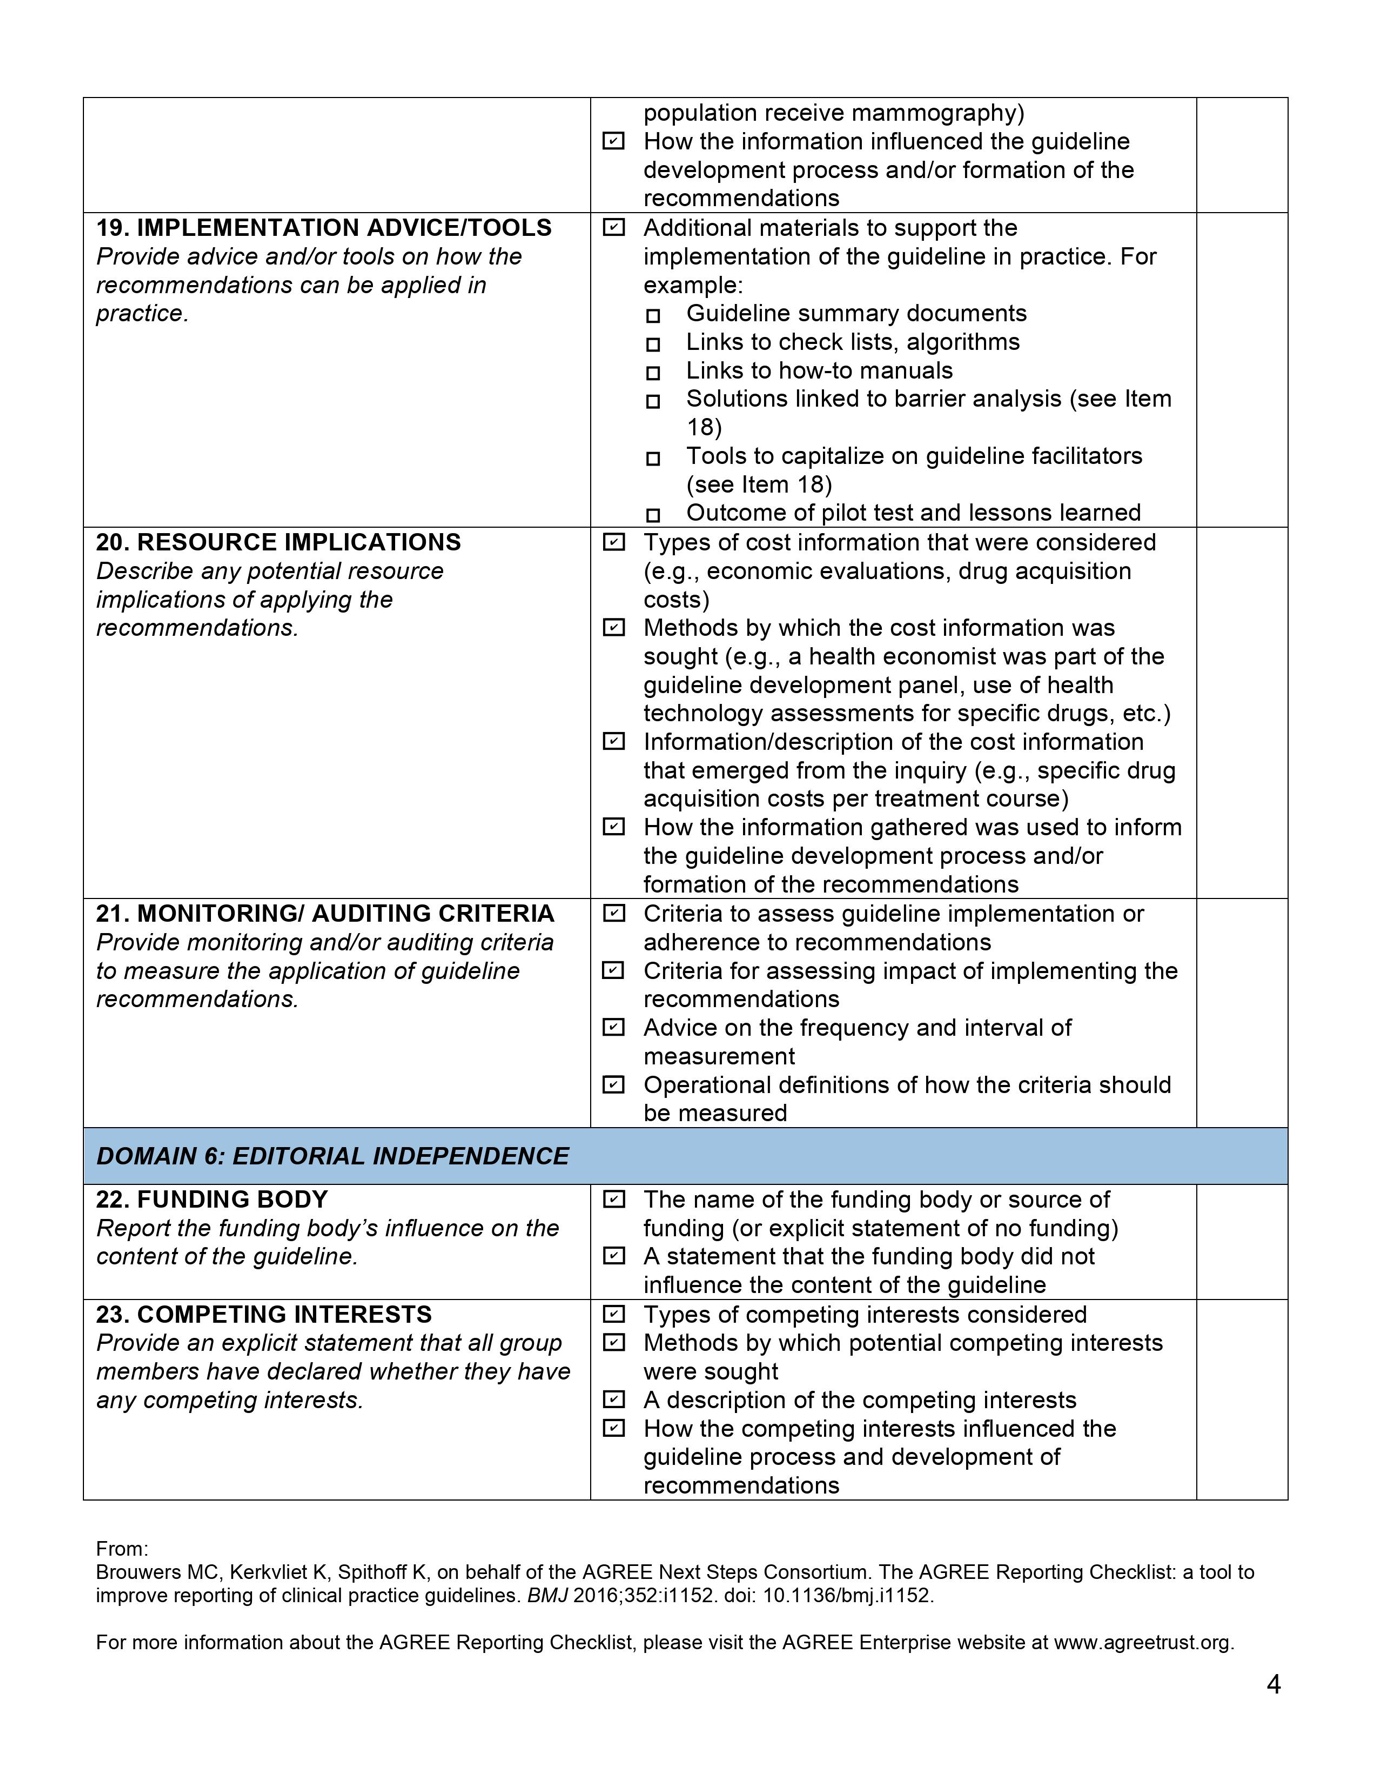

Supplement: mmc1 [file mmc1.docx]
